# Supplementary material for: Targeting Notch1 and IKKα Enhanced NF-κB Activation in CD133+ Skin Cancer Stem Cells
Source: Oxford University Press journal article supplement (doi:10.1158/1535-7163.mct-17-0421), 2018-06-29
Supplement: 15357163mct170421-sup-183098_3_supp_4807697_p9wy34.docx [file 15357163mct170421-sup-183098_3_supp_4807697_p9wy34.docx]

**6/6/2018**

**Supplementary Information**

**Targeting Notch1 and IKK enhanced NF-κB activation in CD133+ Skin Cancer Stem Cells**

Xin Xin Quan1, Nga Voong Hawk 2, Weiping Chen3, Jamie Coupar1, Steven Lee1, David W Petersen4, Paul S Meltzer4, Andrew Montemarano5, Martin Braun6, Zhong Chen1,7, Carter Van Waes1,7

**Supplementary Information includes the following files:**

**1. Supplementary Methods.**

**2. References.**

**3. Supplementary Table 1. Characteristics of human primary SCC samples.**

**4. Supplementary Table 2. Clinical characteristics of tumor samples used in different experimental platforms.**

**5. Supplemental Table 3. GeneGo analysis summery of top 10 ranked signaling pathways for the stem gene signature of CD133+ hcSCC cancer stem cells.**

**6. Supplementary Figure 1. Clinical information of human primary cutaneous SCC samples and schematic strategy for isolation of cancer stem cell population and function assays.**

**7. Supplementary Figure 2. Characteristics of transcriptional profile and the top pathways of differentially expressed genes in CD133+ CSCs population.**

**8. Supplementary Figure 3. IKKα co-localized with CD133 expression in cSCC tissues.**

**Supplementary Methods**

**Human tumor tissue samples.** De-identified primary human skin cSCC tissue samples were obtained under an exemption from IRB approval by the Office of Human Subjects Research, NIH, from Potomac Ambulatory Surgery Center, Bethesda, MD, and Braun Dermatology Associates, Washington D.C. Tumor samples were collected fresh after Mohs micrographic surgery for clinical patients for same-day delivery and processing. The diagnosis and the tumor’s grade were confirmed by a dermatopathologist. Each tumor tissue sample was macrodissected with a scalpel under the microscope to carefully remove the surrounding stroma, and regions with >90% malignant epithelia were obtained. Chopped Tumor tissue was incubated for 30 minutes at 37oC with 200 Unit/ml collagenase III (Sigma, C0255-7.5KU) and 50 U/ml dispase (Gibco by Life Technologies, 17105-041). After briefly spinning down the tissue for 5 minutes at 200g, the pellet was incubated with 0.05% trypsin with EDTA at 37oC for 5 minutes, and filtered with a 40-μm cell strainer to remove the tissue remnants.

**Sphere formation assay setting.** Briefly, before seeding single cell suspension prepared from primary human cSCC sample, irradiated 106 NIH 3T3 fibroblast cells were plated as feeder layer 24h. Then cSCC cells were seeded on it.

**Flow cytometry antibodies and sorting.** The cSCC single cell suspension was labeled with multiple fluorochrome-conjugated mouse anti-human antibodies (10μg/ml/ for each antibody): CD133/1(AC133)-PE (Miltenyi-Biotec), CD24-FITC (Biolegend), CD31-PE/Cy7 (Biolegend), CD61-APC (Invitrogen), and CD45-APC/Cy7 (Biolegend). FcR blocking reagent (Miltenyi-Biotec) was used for blocking non-specific binding. The DNA binding fluorescent chemical compound 7AAD (BD Bioscience) was used for flow cytometric exclusion of dead cells in all samples. For FACS sorting, cells were incubated with antibodies for 1 hour at 4oC. After gating out debris and dead cells (7AAD positive), living cells were first gated for CD61-CD31-CD24-CD45- cells, and then gated and sorted for the remaining CD133- and CD133+ keratinocyte populations using a BD FACSAria-II. Isotype controls (Miltenyi-Biotec) were used for comparison. Flow cytometry analysis was performed with BD LSR II and data were analyzed by FlowJo7.6.5 software.

**RNA quantity and quality and Affymetrix GeneChip Human Gene 1.0 ST Array setting.** 15 paired samples with RIN >7.0 were used for the Affymetrix GeneChip Human Gene 1.0 ST Array. RNA quantity and quality were measured by Nanodrop and Bioanalyzer 2100 (Agilent). Another 7 paired samples were used for the Nanostring gene expression assay to verify the microarray results. 1 ng total RNA (RIN>7.0) was used with the WT-Ovation Pico RNA Amplification System (NuGEN) to generate linear Ribo-SPIA amplified double strand cDNA. A WT-Ovation Exon Module kit (NuGEN) was used to generate sense transcript (ST-cDNA), and an Encore Biotin Module kit (NuGEN) was used for fragmentation and labeling single-stranded cDNA, which is suitable for hybridization to Affymatrix GeneChip. Each sample was hybridized with an Affymetrix GeneChip Human Gene 1.0 ST Array in 45℃ hybridization oven at 60 rpm for 18 hours. Each probe array was washed, stained on an Affymatrix Fluidics Station 450 with protocol FS450_0007, and scanned with an Affymetrix GeneChip Scanner 3000. Data were analyzed with Partek Genomics Suite software and pathway analysis was performed with GeneGo.

**Nanostring nCounter gene expression assay setting.** The nCounter virtual CodeSet contains 149 probes of interested genes, which were customer-generated from RNA microarray data. The images of the immobilized fluorescent reporters were measured in the nCounter Digital Analyzer. 600 fields of views (FOV) were taken per sample. The data were further analyzed with nSolver analysis software 1.0 and Microsoft Excel.

**Antibodies for NF-κB family transcription factor DNA-binding assays.** Nuclear DNA-binding of five NF-κB family subunits was measured with TransAM NF-κB family Kit (Active Motif). Nuclear fraction of SCC13 cells was prepared with Nuclear Extract Kit (Active Motif). The antibodies that can recognize Activated NF-κB were: p50, p52, RELA(p65), c-REL and RELB.

**siRNA interference and gene transfection.** Specific siRNA inhibition of NOTCH1, NOTCH2, IKKα (CHUK), RELA and RELB was performed using ON-TARGETplus SMARTpool siRNA, (Thermo Scientific). ON-TARGETplus Non-targeting pool siRNA was used as negative control. siRNAs were transfected into human SCC 13 cells at 50%–60% confluence with Lipofactamine 2000 (Invitrogen). For each pool of siRNAs, there are a mixture of 4 siRNAs targeting a single gene, with a specific silence efficiency of 75% or better per the manufacturer. We evaluated the inhibition efficiency for target proteins by Western blot. The knockdown efficiencies in this manuscript were similar to those validated by the manufacturer, as well as in many publications, such as ([1-3](#_ENREF_1)). After transfection for 48 hours, cells were harvested by 0.05% trypsin digestion and stained with CD133-conjugated PE for FACS analysis. For IKKα, wild type (WT) expression and its mutant constructs, including phosphoacceptor-mutant (AA), constitutively activated (EE), and kinase dead (KA) IKK vectors were obtained and transfected following previous publication (Liesl Oncogene).

**Luciferase reporter gene assays.** NF-κB Luciferase gene activities were performed with dual-Light System Kit (Applied Biosystems). The signals were tested on Wallac Victor2 1420 Multilabel Counter (Perkin Elmer) with β-Gal as normalization control.

**Antibodies and solutions used in Western blotting.** The antibodies used include IKKα (Cell Signaling, 2682), RELA (Santa Cruz sc-109), RELB (Cell Signaling, 4954), Notch1, Notch2, β-tubulin (Sigma Aldrich, T8328), anti-rabbit IgG-HRP (Cell Signaling, 7074). The whole cell lysates as well as nuclear and cytoplasmic extracts were obtained using the Nuclear Extraction Kit (Active Motif). Whole cell lysates were obtained using NP-40 lysis buffer (Invitrogen, FNN0021). Cytoplasmic lysates were obtained using a buffer containing 10 mM Hepes (pH 7.9), 10 mM KCl, 0.1 mM EDTA, and 0.1 mM EGTA with freshly added protease inhibitor, 1mM DTT, and 0.5% NP40. After cytoplasmic lysates collection the remaining cell pellet was treated with a buffer containing 20 mM Hepes (pH 7.9), 0.4 M NaCl, 1 mM EDTA, and 1 mM EGTA with freshly added protease inhibitor and 1 mM DTT to obtain nuclear lysates. 15 g of lysates were mixed with NuPage LDS Sample Buffer (Invitrogen, NP0007) and NuPage Sample Reducing Agent (Invitrogen, NP0009) and heated at 99°C for 3 minutes. IKKα and RELA antibodies were diluted in 5% (w/v) nonfat dry milk in TBST and RELB antibody was diluted in 5% (w/v) BSA in TBST. Membranes incubated with a chemiluminescent HRP substrate reagent (SuperSignal West Pico Chemiluminescent Substrate, Thermo Scientific, 34080), and exposed to HyBlot ES Autoradiography Film (Denville Scientific Inc. #E3212).

**RNA Isolation.** Cells were trypsinized and spun down and the resulting pellet was suspended in 1ml Trizol and left at room temperature for five minutes to lyse cells. After adding 0.2ml chloroform with vigorous shaking cells were left for three minutes and were then spun down at 13.2krpm for twenty minutes. The aqueous phase was transferred to a new tube and an equal amount of 70% ethanol was added. This was transferred to a spin column from a Qiagen RNeasy Mini Kit (cat. No 74104) and the remainder of the isolation was carried out as per Qiagen kit instructions with a final elution volume of 50ul.

**Immunofluorescent staining (IF) and Confocal Microscopy.** Two IF images were shown as the representative results of co-localization of CD133 and IKK. The staining experiments were performed in more than 12 frozen tissue samples, and the image sections were confirmed to be from viable non-necrotic tissue in the tumor periphery region, to avoid tissue damage or edge effects. Anti-CD133 (1:11) and IKK (1:500) antibodies were purchased from Miltenyi Biotec and LifeSpan BioSciences, and the IF staining protocol were used as in our previous publication ([4](#_ENREF_4)). IF confocal microscopy images were obtained using a Zeiss LSM 510 NLO META confocal microscope equipped with Plan-Apochromat 20X (0.8 N.A.) objectives (Zeiss, Thornwood, NY). A 488 nm argon, and 543 nm HeNe1 were used to excite Alexa Fluor 488 and Alexa Fluor 555 fluorophores, respectively. The pinholes for each laser line were aligned for optimal confocality. A Ti:Sapphire 1.5 W Cameleon Two-photon laser was used for DAPI illumination. The two-photon laser was tuned to 750 nm and used at ~2-3% power.

**Compounds' structure and the source:**

Two different γ-secretase inhibitors DAPT (Catalog No. D5942, Sigma Aldrich, St Louis, MO), and RO4929097 (Catalog No. ADV465749148, Sigma Aldrich, St Louis, MO) were used to inhibit Notch. Wedelolactone (Catalog #56639, Sigma Aldrich, St Louis, MO) were used for inhibiting NF-κB signaling. The structure of these compounds and the source links of the compounds are the following:

DAPT:
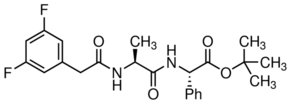


RO492907:
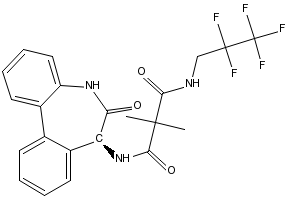


Wedelolactone:
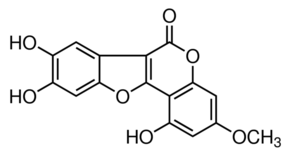


DAPT: <https://pubchem.ncbi.nlm.nih.gov/compound/dapt>

RO4929097:  <https://pubchem.ncbi.nlm.nih.gov/compound/49867930#section=Top>

Wedelolactone: <https://pubchem.ncbi.nlm.nih.gov/compound/Wedelolactone#section=Top>

**References:**

1. Guerrero PA, Yin W, Camacho L, Marchetti D. Oncogenic role of Merlin/NF2 in glioblastoma. Oncogene **2015**;34(20):2621-30 doi 10.1038/onc.2014.185.

2. Redmond EM, Liu W, Hamm K, Hatch E, Cahill PA, Morrow D. Perivascular delivery of Notch 1 siRNA inhibits injury-induced arterial remodeling. PloS one **2014**;9(1):e84122 doi 10.1371/journal.pone.0084122.

3. Dabral S, Tian X, Kojonazarov B, Savai R, Ghofrani HA, Weissmann N*, et al.* Notch1 signalling regulates endothelial proliferation and apoptosis in pulmonary arterial hypertension. The European respiratory journal **2016**;48(4):1137-49 doi 10.1183/13993003.00773-2015.

4. Patel GK, Yee CL, Terunuma A, Telford WG, Voong N, Yuspa SH*, et al.* Identification and characterization of tumor-initiating cells in human primary cutaneous squamous cell carcinoma. J Invest Dermatol **2012**;132(2):401-9 doi 10.1038/jid.2011.317.

**Supplementary Tables:**

**Supplementary Table 1.**

**
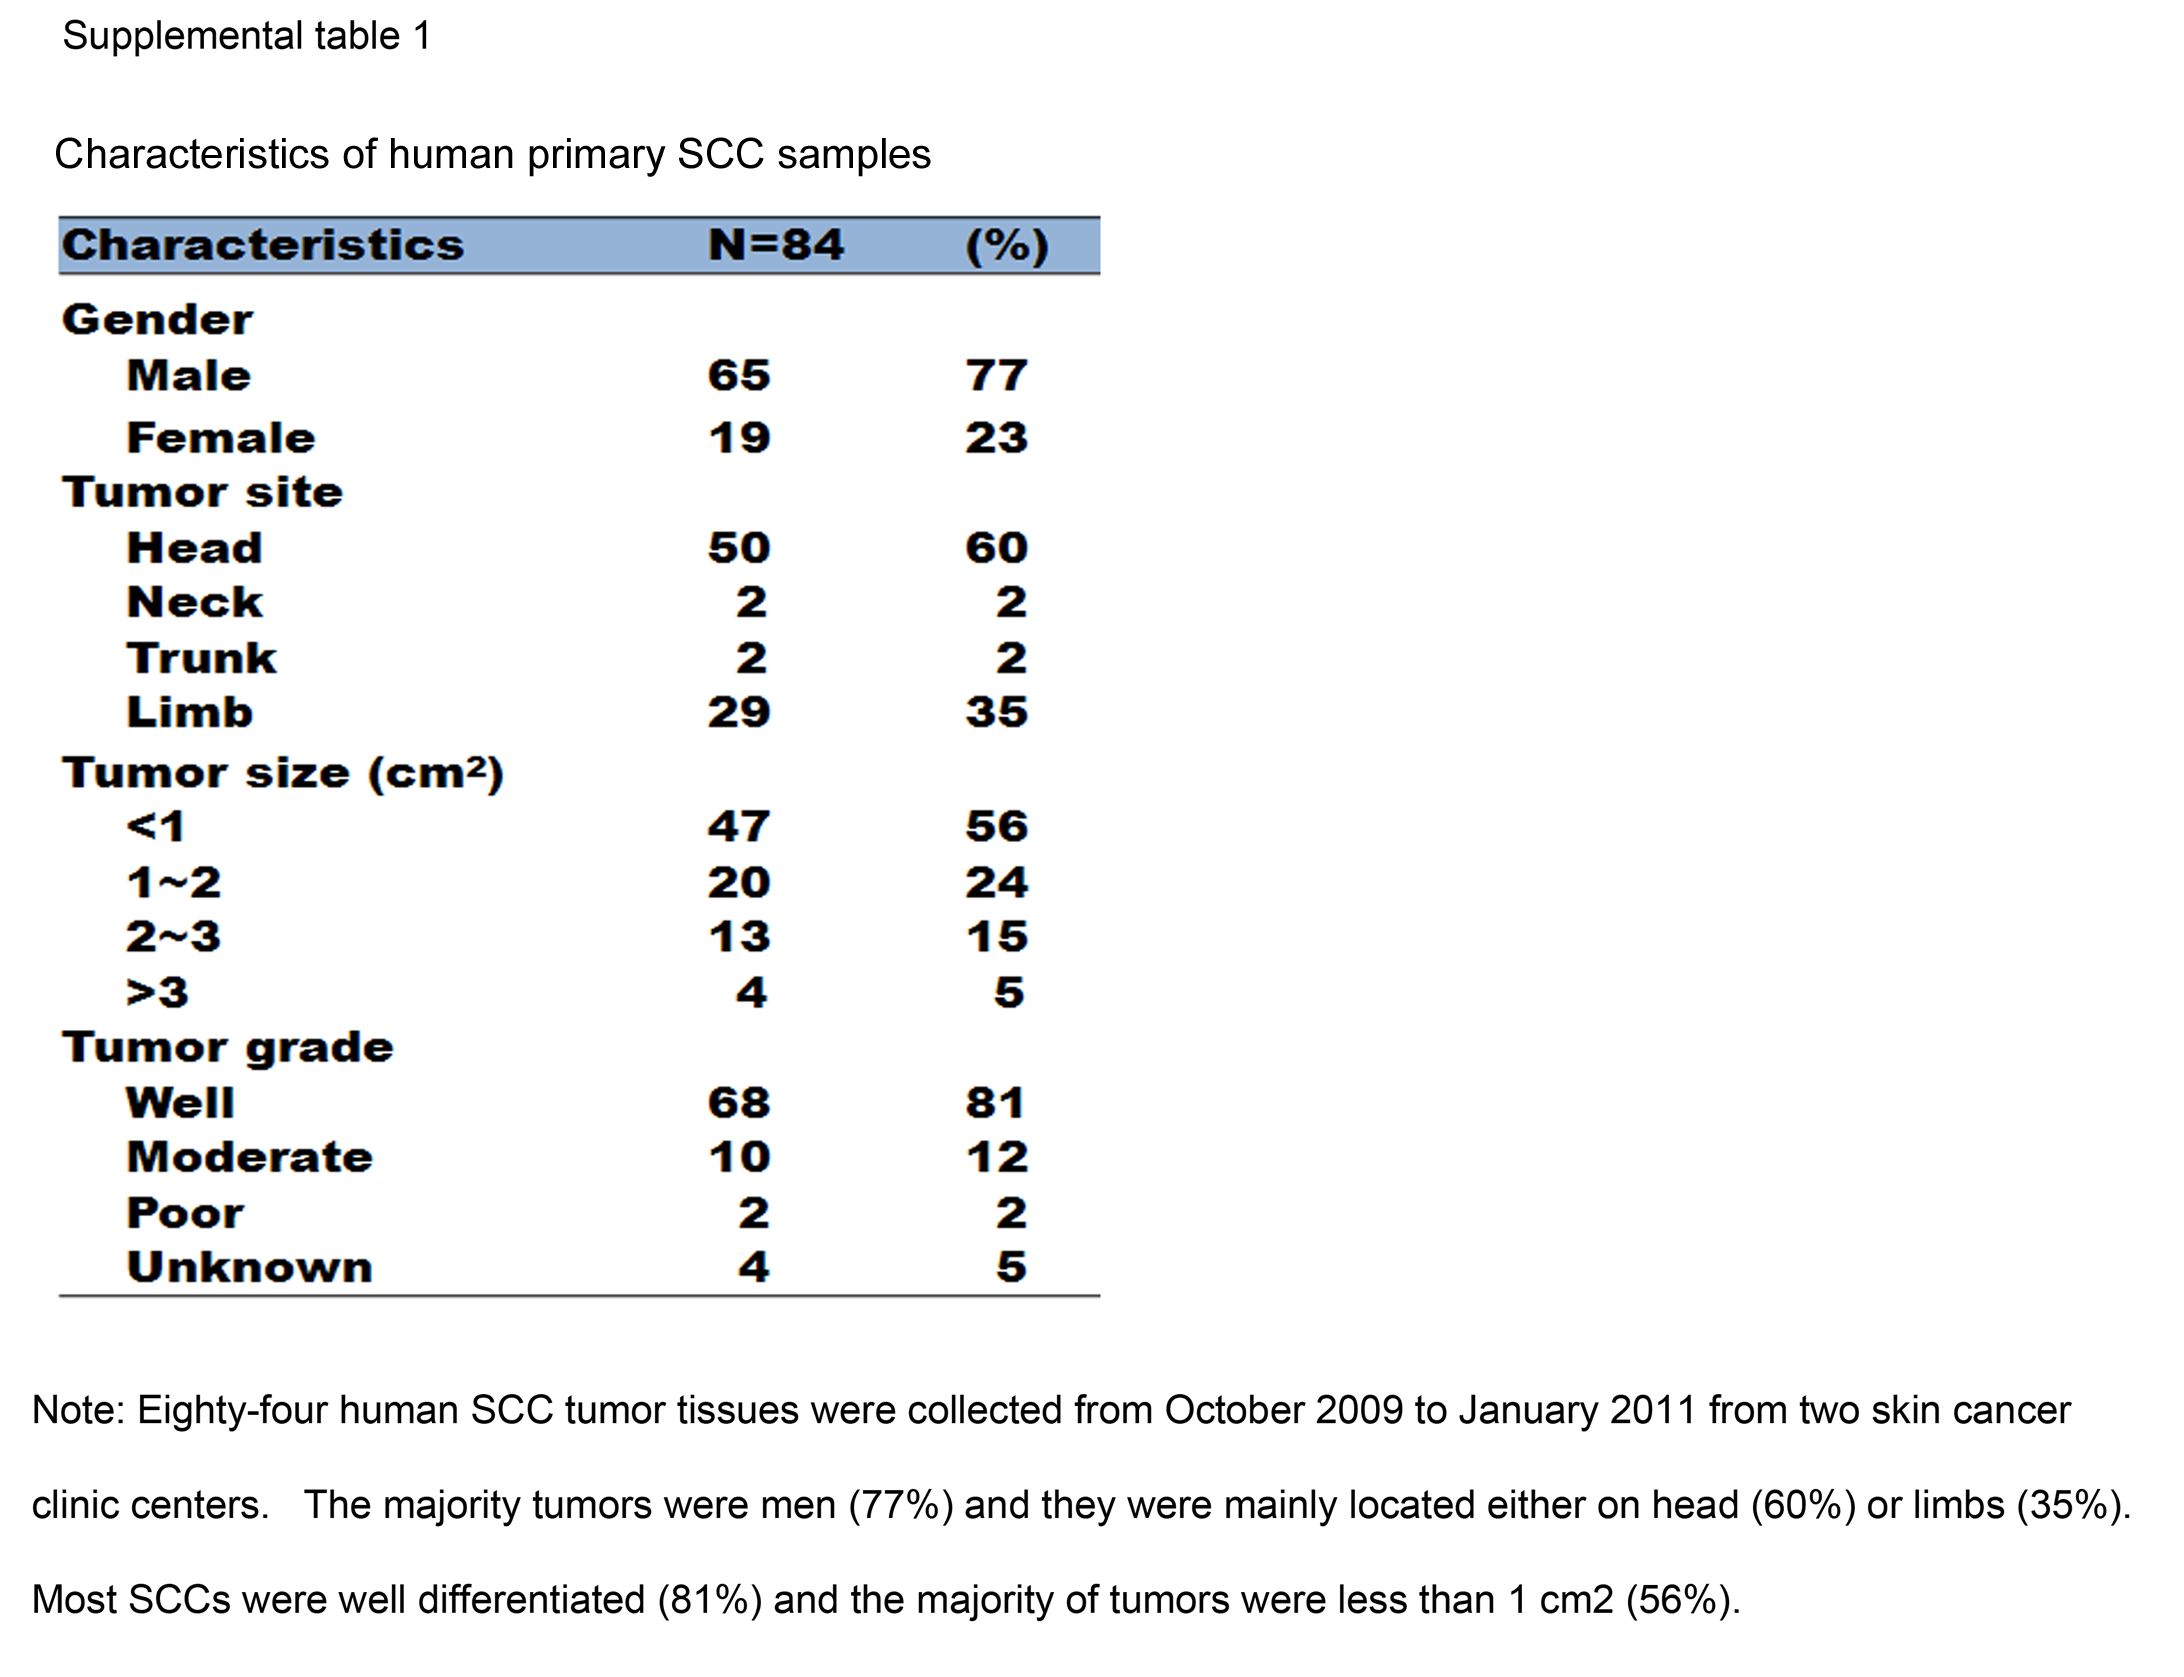
**

**Supplemental Table 2.**

**Supplemental Table 3.**

**
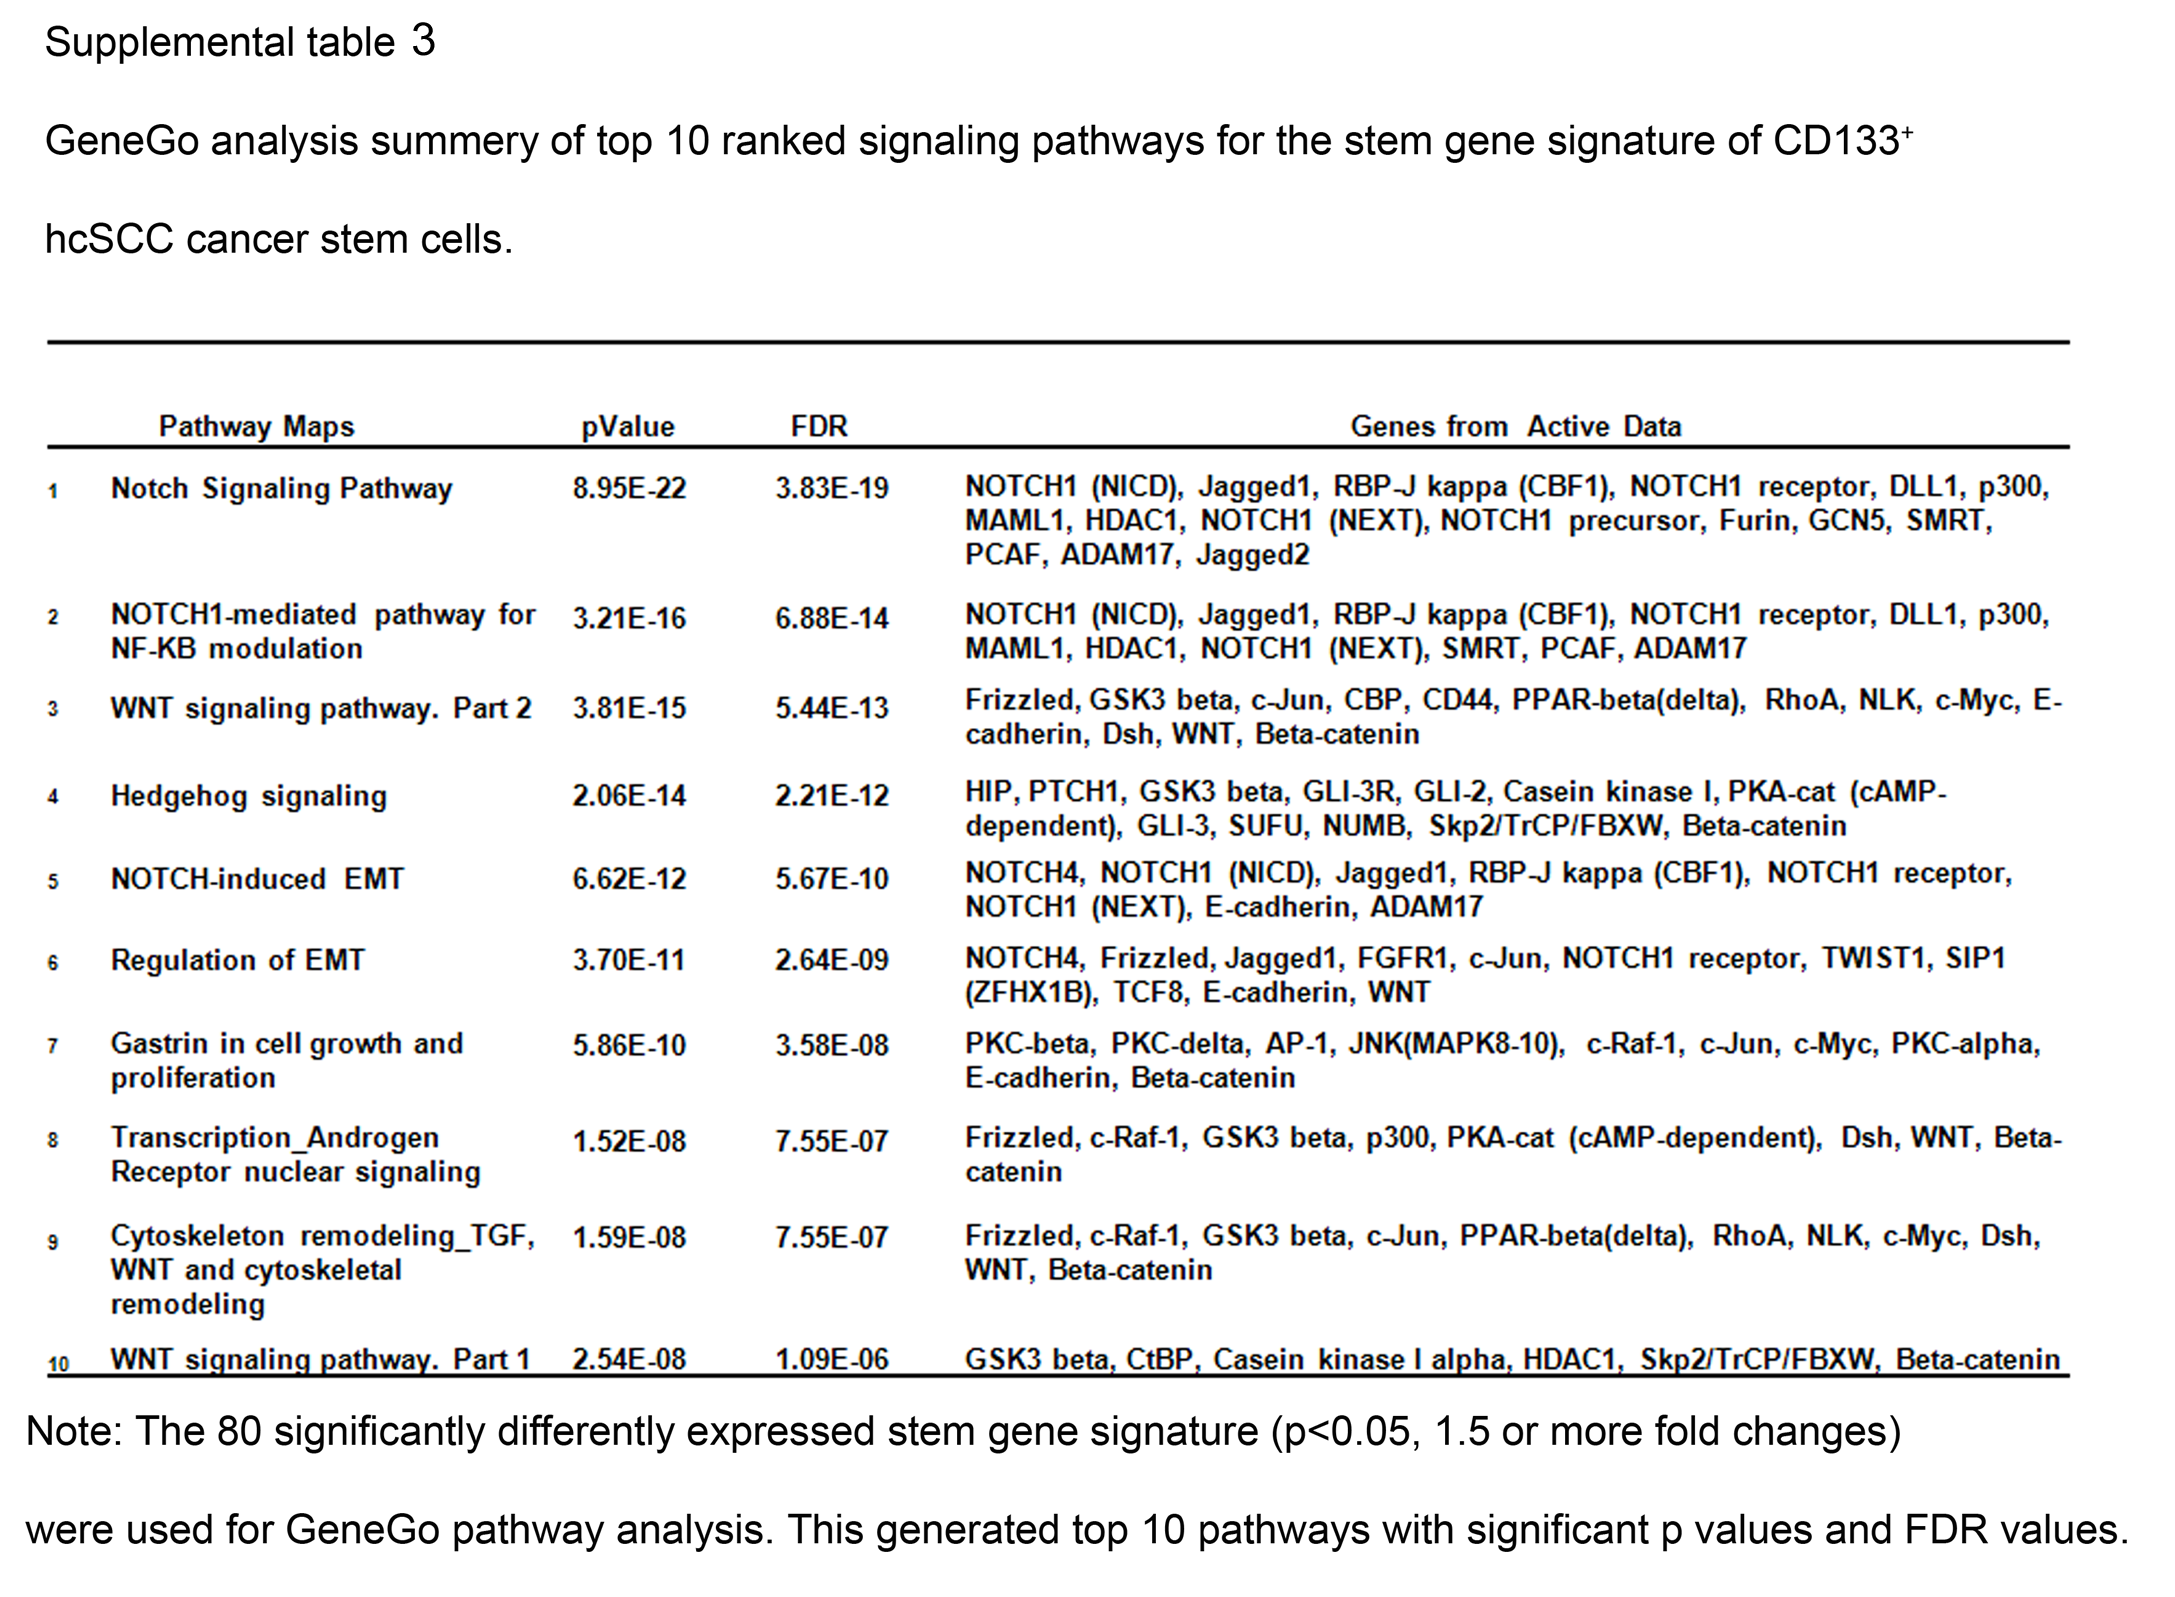
**

**Supplementary Figures:**

**
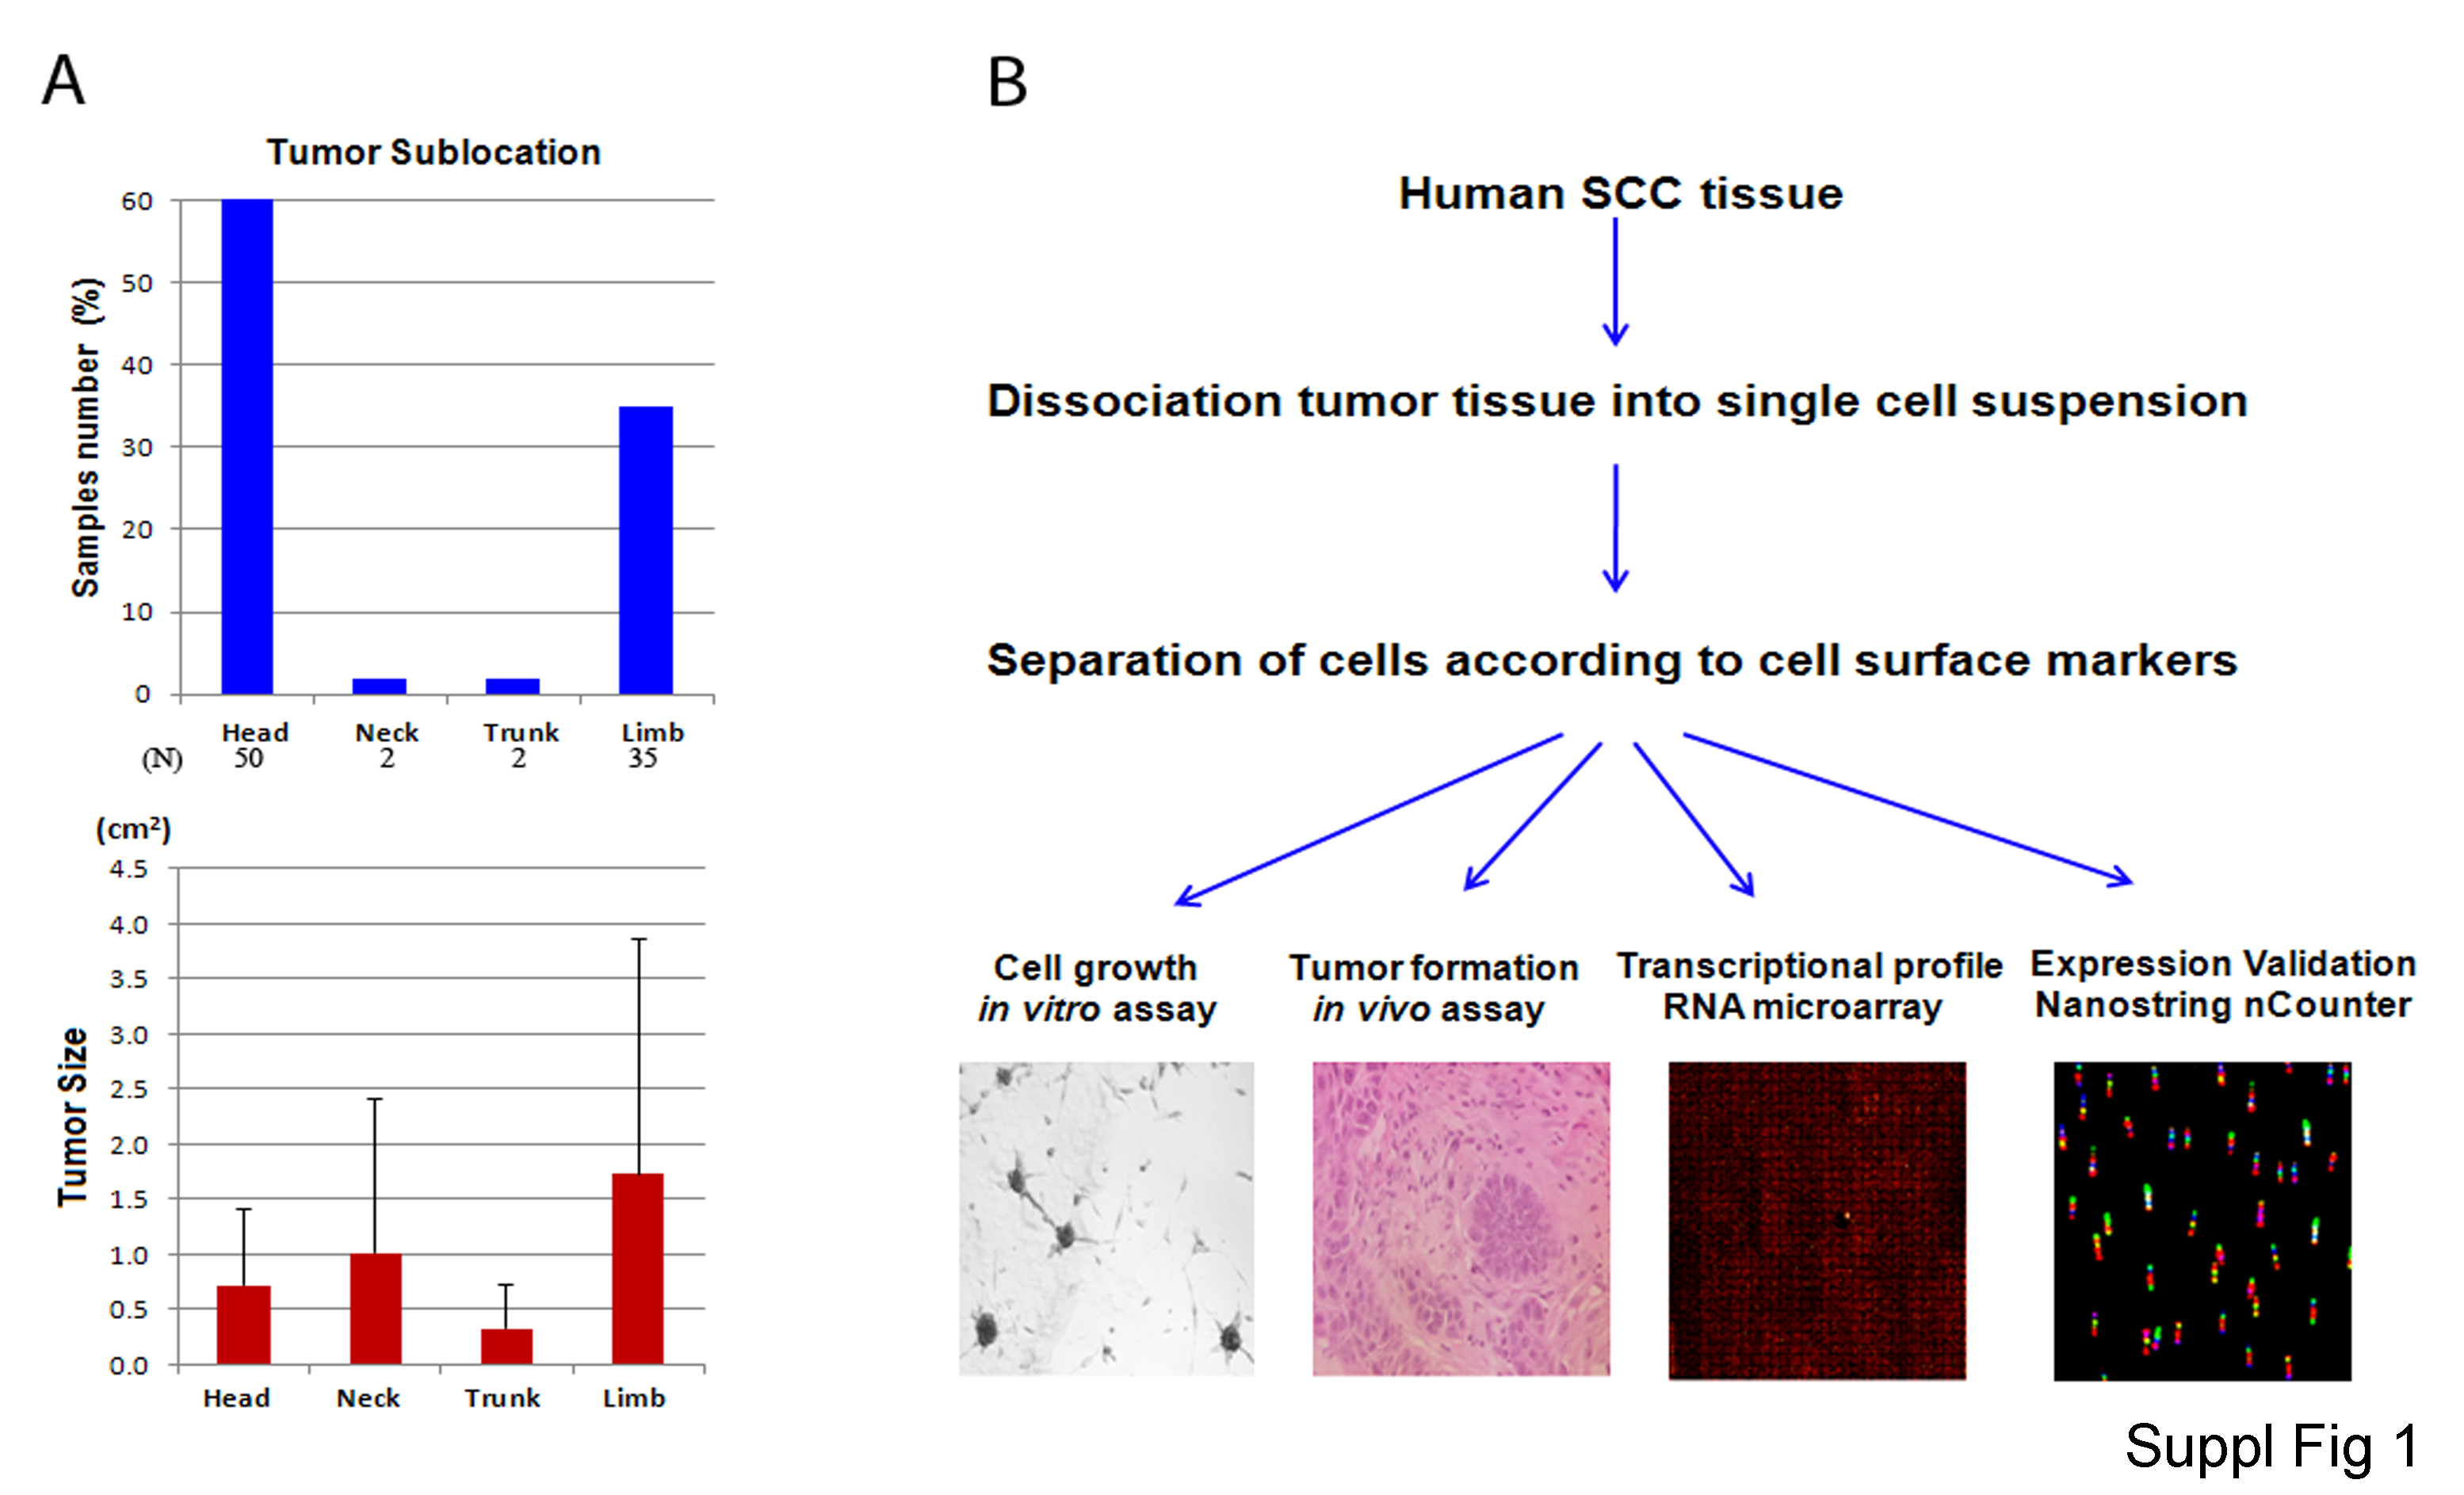
**

**Supplementary Figure 1.**  **Clinical** **information of human primary cutaneous SCC samples and schematic strategy for isolation of cancer stem cell population and function assays.** (A) Clinical information of human primary cutaneous SCC samples. 82 cutaneous squamous cell carcinoma tissues were obtained from two clinic centers. Among them, there are 51 (62.2%) from head region, 1 (1.2%) from neck region, 2 from body region (2.4%) and 28 (34.2%) from limb region. The tumor size was measured with horizontal and vertical diameter (cm) and calculated the area (cm2). The average of tumor size from head, neck, trunk and limb regions is 0.9 cm2, 2 cm2, 1.8 cm2 and 1.79 cm2 respectively. (B) Schematic strategy for isolation of human cutaneous SCC cancer stem cell population and following function assays. Briefly, the primary SCC tumor was dissociated into the single cell suspension with collagenase and dispase digestion following with GentleMACS machine dissociation. The single SCC cells were labeled with multiple CD surface markers and sorted into two cell subpopulation. The multiple bioassays were performed to further study these two subset cells cancer stem properties including sphere formation in vitro assay, tumor formation in vivo assay. And the whole gene expression profile was analyzed using RNA microarray and verified with Nanostring nCounter gene expression assay.

**Supplementary Figure 2. Characteristics of transcriptional profile and the top pathways of differentially expressed genes in CD133+ CSCs population.** (A) Identification of 80 up- or down-regulated stem cell gene signatures in CD133+ cells compared with CD133- cells from 15 tumor specimens using Affymetrics microarray. After subtraction of 80 overlapped genes, Venn diagram of pink cycle shows total of 2009 genes with significantly altered expression in CD133+ cells compared with CD133- cells (fold change >1.5, ANOVA analysis, p<0.05). There are 167 stem gene lists from literatures (green circle), after subtraction of 80 overlapped genes. (B) Top 10 ranked pathways from 80 stem gene expression signatures by GeneGo analysis. (C) Top 20 pathways identified from 2089 differentially expressed genes in CD133+ CSCs population by IPA analysis. X axis, negative log p value of statistical significance. (D) Hierarchical cluster analysis of WNT pathways from significantly differentially expressed 2089 genes in CD133+ CSCs compared with CD133- tumor cells.

**
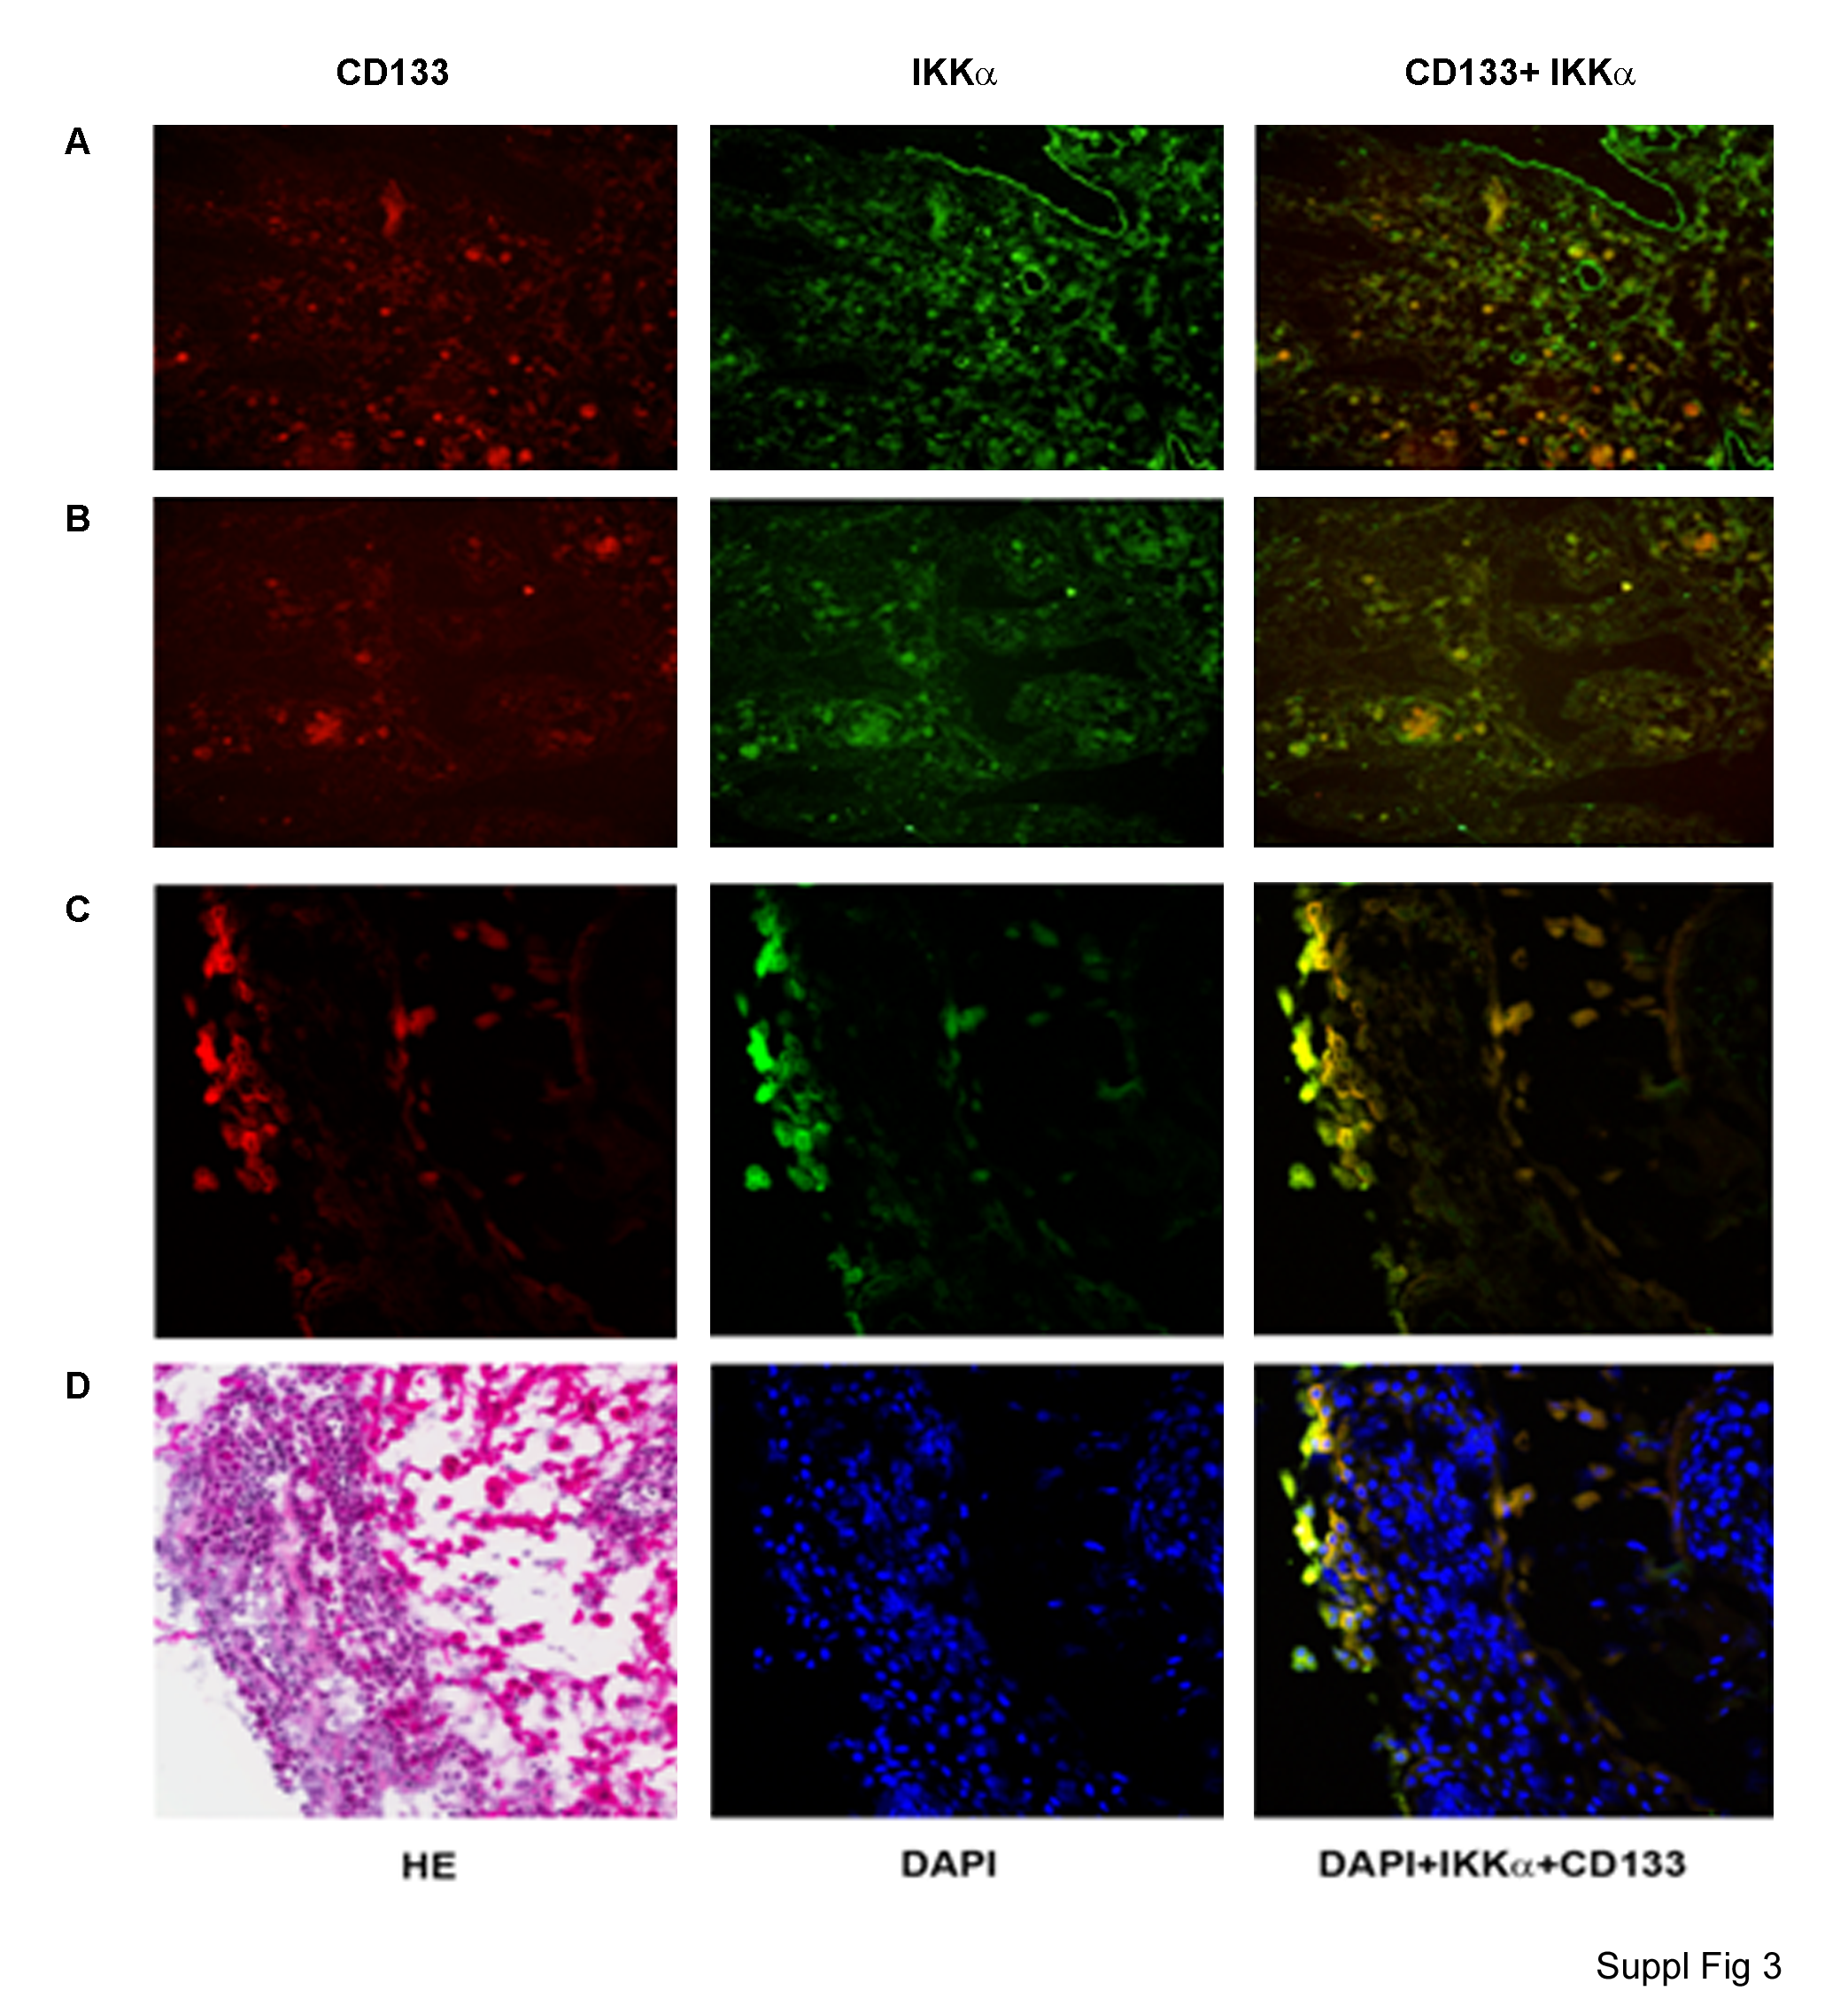
Supplementary Figure 3.** **IKKα co-localized with CD133 expression in cSCC tissues.**

(A, B) Frozen sections of two additional cSCC tumors show co-immunostaining of a subset of tumor cells using anti-CD133 and IKKα and primary antibodies followed by Alexa-Fluor-555 (red) and Alexa-Fluor- 488 (green) secondary antibodies. Magnification, 100X. (C) CD133, IKKα and merged staining, and (D) H&E, DAPI (blue) and merged CD133/IKK/DAPI staining of a fourth tumor specimen. Magnification, 200X.
